# Supplementary material for: Ablation of Nonmuscle Myosin II-B and II-C Reveals a Role for Nonmuscle Myosin II in Cardiac Myocyte Karyokinesis
Source: PubMed Central journal article supplement — Mol Biol Cell. 2010 Nov 15;21(22):3952–62. doi: 10.1091/mbc.E10-04-0293 (PMC2982113; doi:10.1091/mbc.e10-04-0293), 2010-11-15
Supplement: E10-04-0293_1.pdf [file E10-04-0293_1.pdf]

SUPPLEMENTAL MATERIAL

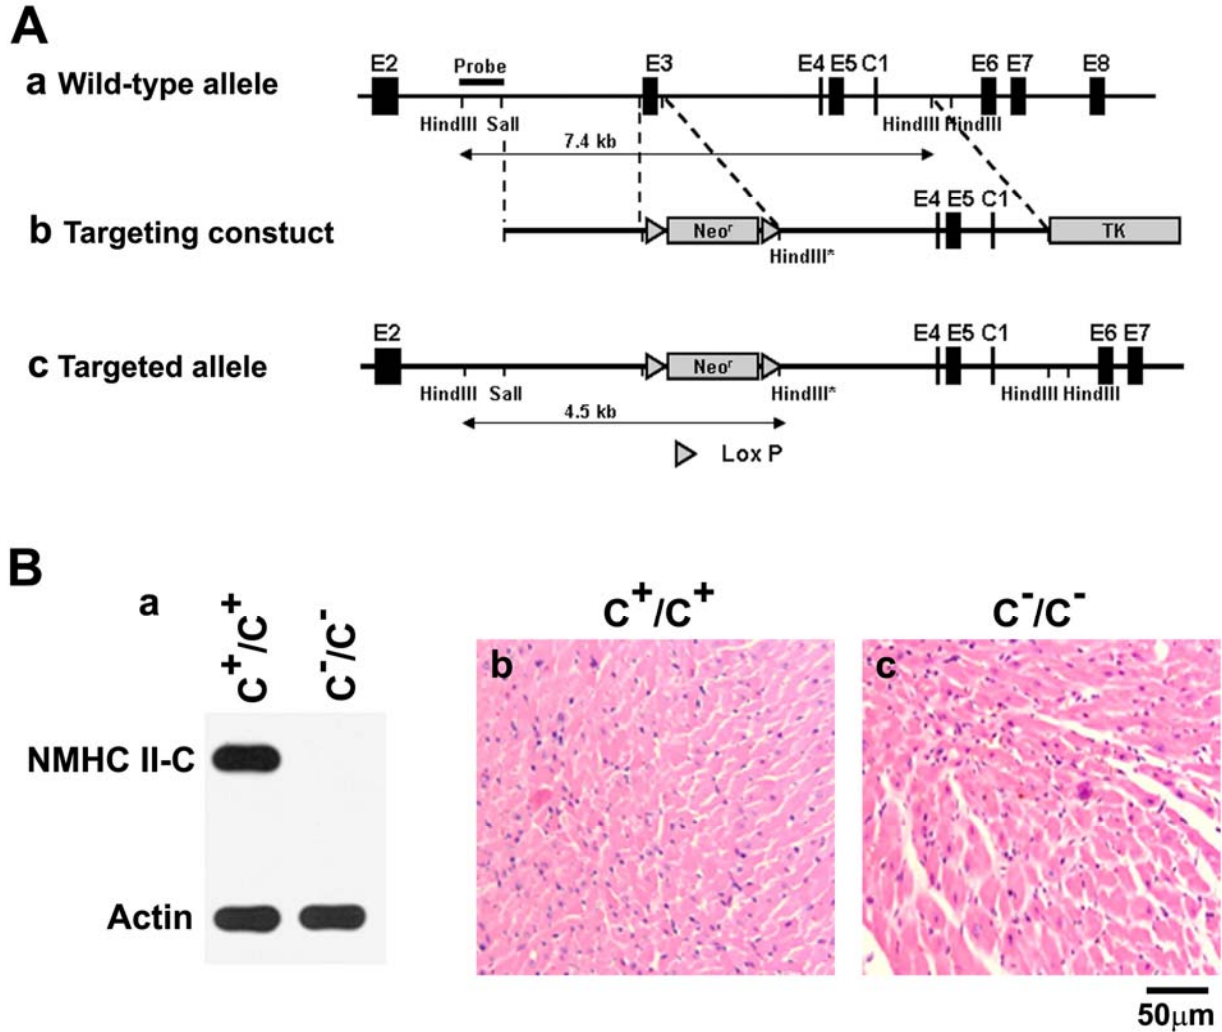

**Fig. S1. Schematic Diagram and Characterization of NMHC II-C Ablated Mice.** (Aa) Wild-type NMHC II-C allele, (b) targeting construct for NMHC II-C ablation and (c) targeted NMHC II-C null allele. Black rectangles, exons; thin black line, intron; gray rectangles, selection cassettes. Probe used for genotyping is indicated. The  $Neo^r$  cassette includes a HindIII site denoted by HindIII\*. (Ba) Immunoblot demonstrating absence of NMHC II-C in lungs of  $C^-/C^-$  mouse. (b,c) H&E staining of heart sections from 5-month  $C^+/C^+$  (b) and  $C^-/C^-$  (c) mice. No obvious pathological defects are seen in  $C^-/C^-$  hearts compared to  $C^+/C^+$  hearts.

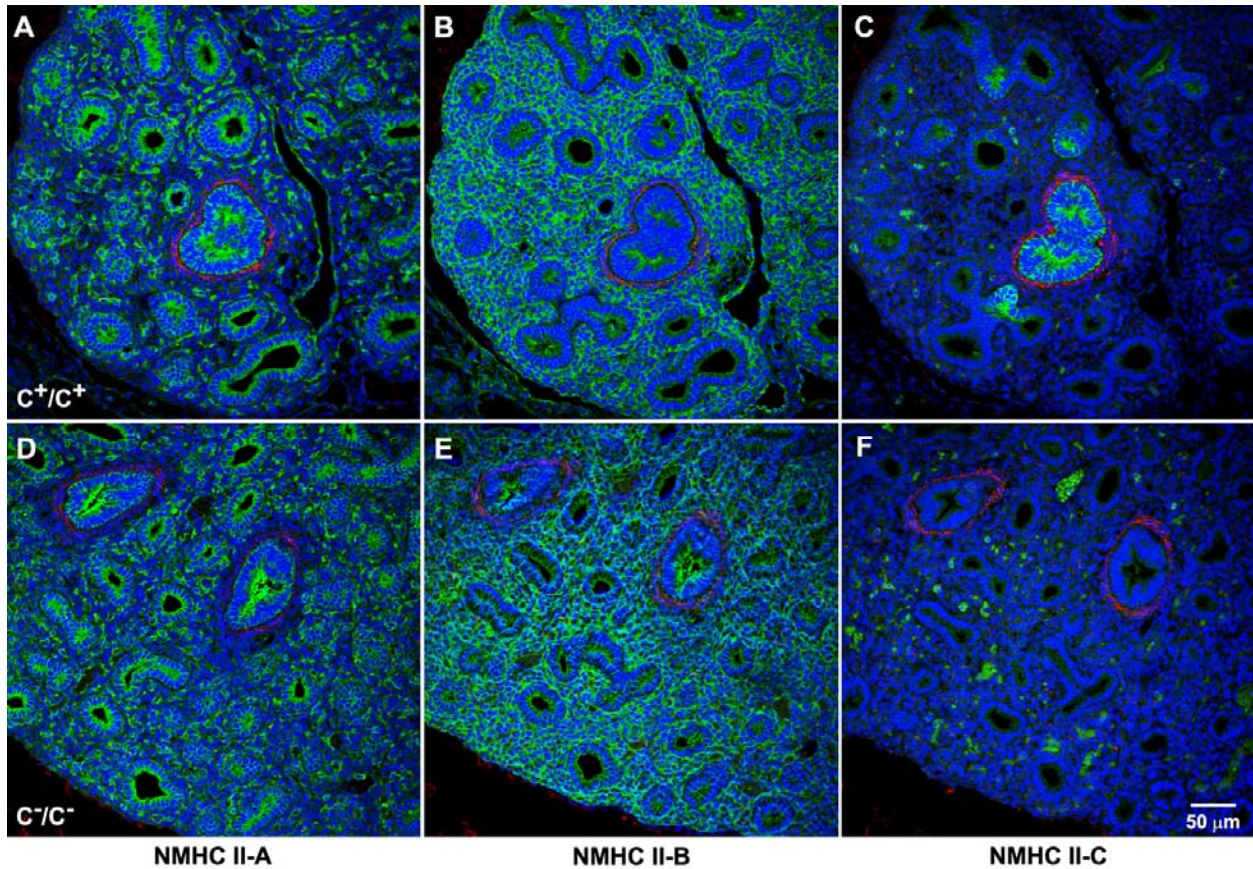

**Fig. S2. NM II-C Null Mice Develop Normal Lungs with No Changes in NM II-A and II-B Expression.** Immunofluorescence confocal images of serial sections from E13.5 wild-type (A-C) and  $C^-/C^-$  (D-F) mouse lungs stained for NMHC II-A (green, A,D), II-B (green, B,E), and II-C (green, C,F) together with desmin (red, a marker for smooth muscle cells). There is no change in the expression of NM II-A and II-B between wild-type (A,B) and  $C^-/C^-$  (D,E) lungs. NM II-C is only expressed in the epithelial cells of wild-type lungs (C) and is not detected in  $C^-/C^-$  lung (F). The green fluorescence spots seen in F are due to red blood cells. DAPI (blue) stains the nuclei.

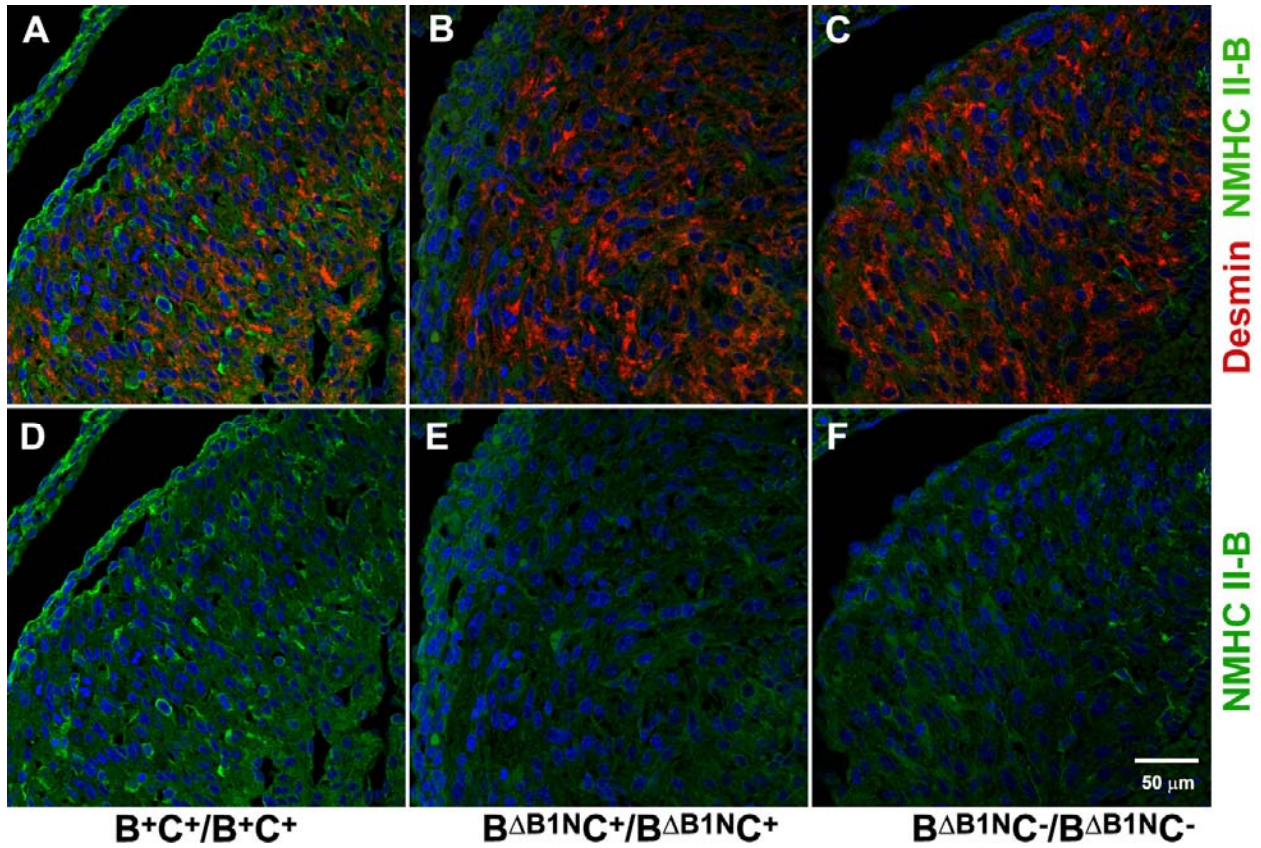

**Fig. S3. Ablation of NM II-C Does Not Affect NM II-B Expression in  $B^{\Delta B1NC}/B^{\Delta B1NC}$  Mouse Hearts.** Immunofluorescence confocal images of heart sections from E13.5  $B^{+C+}/B^{+C+}$  (A,D)  $B^{\Delta B1NC+}/B^{\Delta B1NC+}$  (B,E), and  $B^{\Delta B1NC-}/B^{\Delta B1NC-}$  (C,F) mice stained for NMHC II-B (green, A,D), and desmin (red, a marker for cardiac myocytes, A-C). Both  $B^{\Delta B1NC+}/B^{\Delta B1NC+}$ ,  $B^{\Delta B1NC-}/B^{\Delta B1NC-}$  hearts show marked decrease in NM II-B expression compared to wild-type hearts. No obvious difference is seen in the level of NM II-B expression between  $B^{\Delta B1NC+}/B^{\Delta B1NC+}$  and  $B^{\Delta B1NC-}/B^{\Delta B1NC-}$  hearts. DAPI (blue) stains the nuclei.

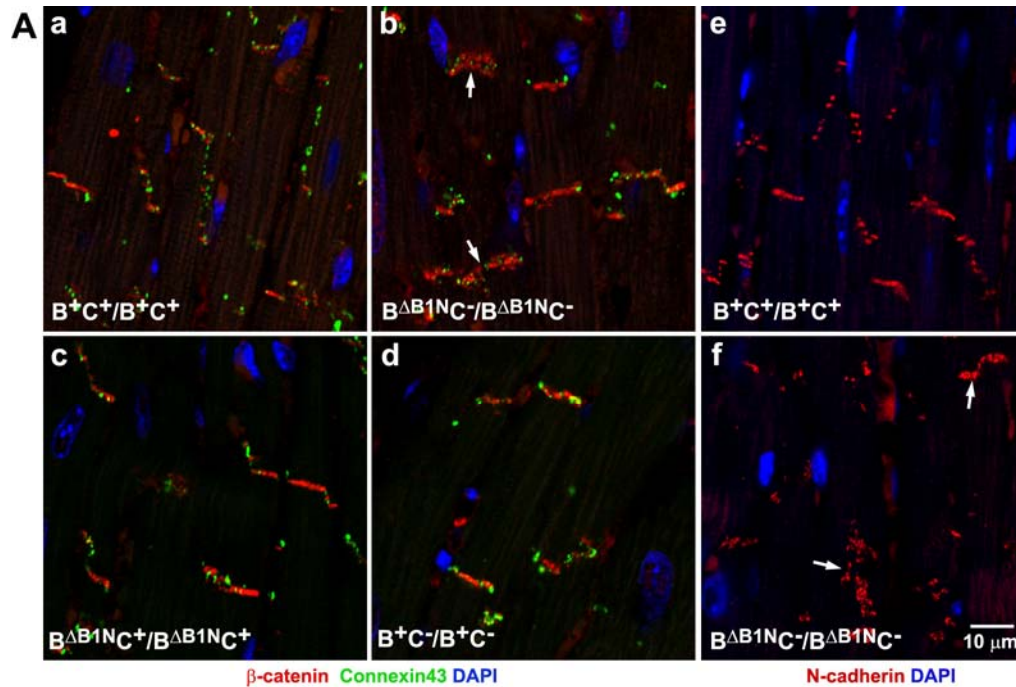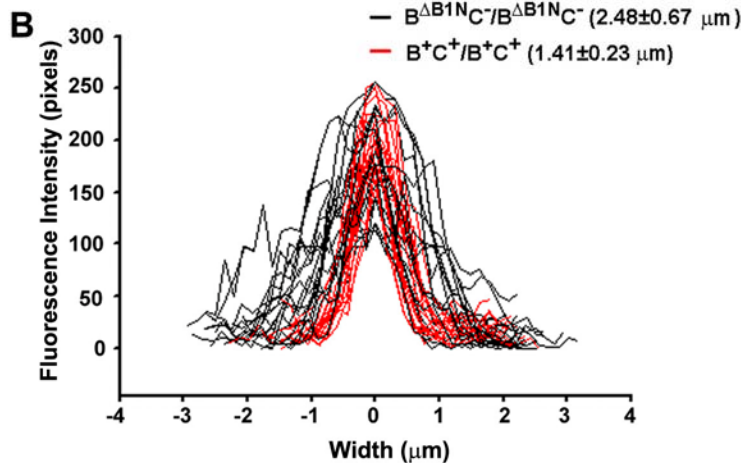

**Fig. S4. Impaired Localization of  $\beta$ -Catenin and N-cadherin in  $B^{\Delta B1NC-}/B^{\Delta B1NC-}$  Intercalated Discs.** (A) Immunofluorescence confocal images of adult heart sections from  $B^{+C+}/B^{+C+}$ ,  $B^{\Delta B1NC-}/B^{\Delta B1NC-}$ ,  $B^{\Delta B1NC+}/B^{\Delta B1NC+}$ , and  $B^{+C-}/B^{+C-}$  mice stained for  $\beta$ -catenin (red, a-d), connexin43 (green, a-d) and N-cadherin (red, e,f). In contrast to  $B^{+C+}/B^{+C+}$  (a,e),  $B^{+C-}/B^{+C-}$  (d), and  $B^{\Delta B1NC+}/B^{\Delta B1NC+}$  (c) cardiac myocytes where  $\beta$ -catenin and N-cadherin very precisely stain the intercalated discs,  $B^{\Delta B1NC-}/B^{\Delta B1NC-}$  myocytes (arrows, b,f) show a diffuse  $\beta$ -catenin and N-cadherin staining. No difference in connexin43 staining (green, a-d) is observed among these four genotypes. Nuclei were stained by DAPI (blue). (B) Profiles of  $\beta$ -catenin staining at the intercalated discs for  $B^{+C+}/B^{+C+}$  (red lines) and  $B^{\Delta B1NC-}/B^{\Delta B1NC-}$  (black lines) mouse hearts.  $B^{\Delta B1NC-}/B^{\Delta B1NC-}$  hearts showed a diffuse  $\beta$ -catenin distribution manifested by widened  $\beta$ -catenin staining at the intercalated discs compared to the wild-type hearts. An embedded Zeiss LSM image profile tool is used to quantify the fluorescence intensity along a line drawn vertically across the intercalated discs.

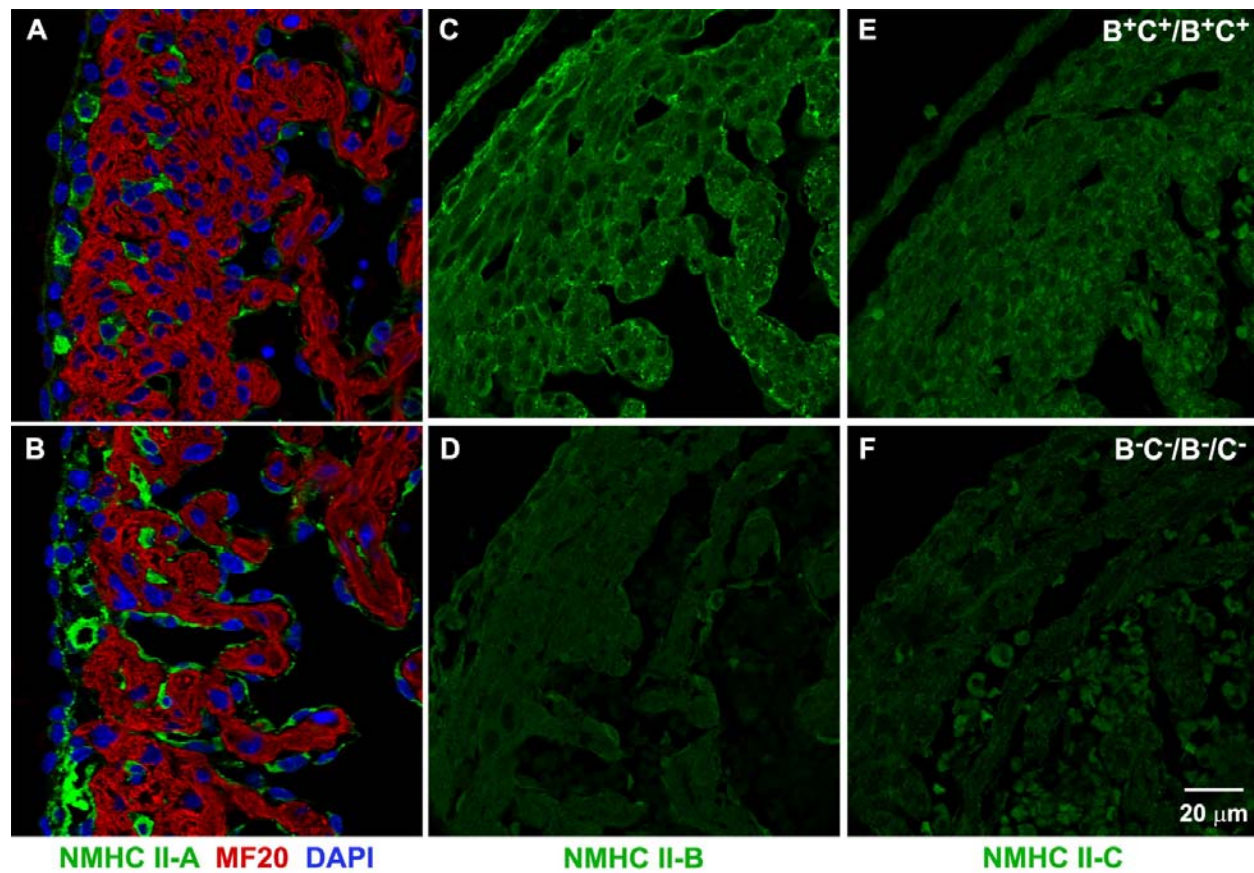

**Fig. S5. Simultaneous Ablation of NM II-B and II-C in  $B^{-}C^{-}/B^{-}C^{-}$  Hearts.** Immunofluorescence confocal images of heart sections from E13.5  $B^{+}C^{+}/B^{+}C^{+}$  (A, C, and E) and  $B^{-}C^{-}/B^{-}C^{-}$  (B, D, and F) mice stained with antibodies to NMHC II-A (green, A,B), II-B (green, C,D) and II-C (green, E,F), and MF20 (red, a marker for cardiac myocytes, A,B). Panels A and B are merged images of NMHC II-A (green), MF20 (red) and DAPI (blue, nuclei) staining. In both  $B^{+}C^{+}/B^{+}C^{+}$  (A) and  $B^{-}C^{-}/B^{-}C^{-}$  (B) hearts NMHC II-A only stains the non-myocytes.  $B^{+}C^{+}/B^{+}C^{+}$  hearts showed diffuse staining of NMHC II-B (C) and II-C (E) at this age. Neither NMHC II-B (D) nor II-C (F) is detected in  $B^{-}C^{-}/B^{-}C^{-}$  hearts.

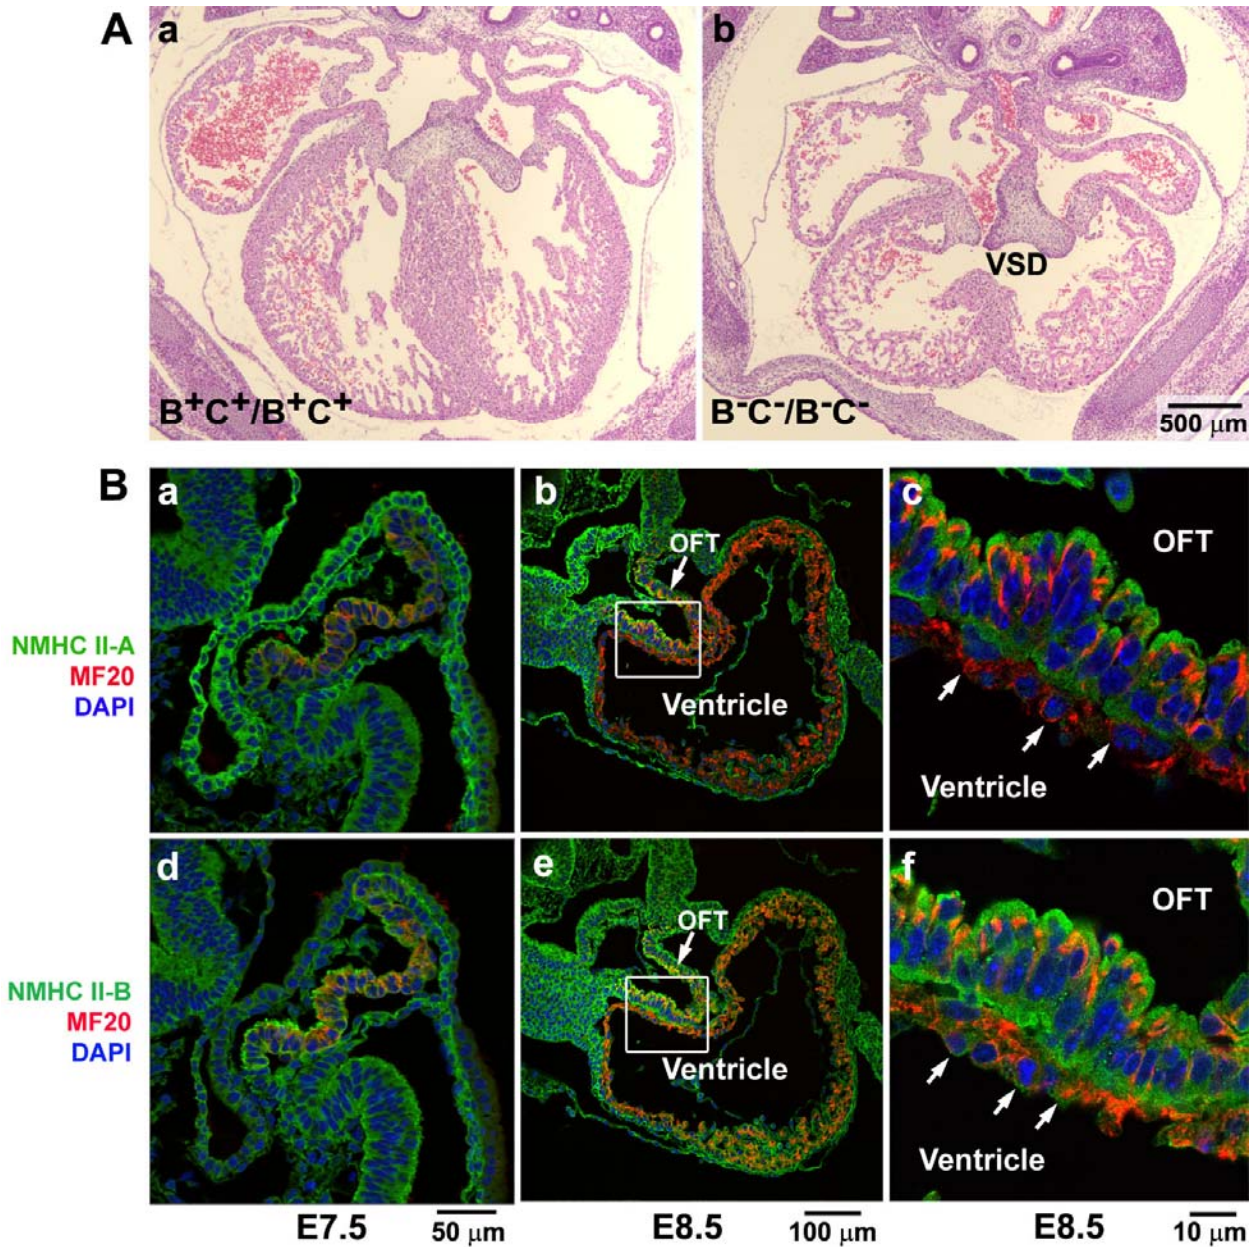

**Fig. S6. Expression of NM II during Early Heart Formation.** (A) H&E stained mouse heart sections from  $B^+C^+/B^+C^+$  (a) and  $B^-C^-/B^-C^-$  (b) mice at E13.5. The  $B^-C^-/B^-C^-$  heart is hypoplastic with a very thin compact myocardium and ventricular septal defect (VSD, b), but develops four chambers. (B) Immunofluorescence confocal images of wild-type mouse hearts at E7.5 and E8.5 stained for NMHC II-A (green, a-c) and II-B (green, d-f), and co-stained for MF20 (red, a marker for cardiac myocytes). At E7.5, the early cardiac myocytes (a,d) show co-staining of NMHC II-A and MF20 (a) or NMHC II-B and MF20 (d) indicating that both NMHC II-A and II-B are expressed in cardiac myocytes at this stage. At E8.5, the cardiac myocytes in the developing outflow tract (OFT) still express both NMHC II-A (b, magnified in c) and II-B (e, magnified in f), however in the ventricular myocytes at E8.5 (arrows, c,f) only NMHC II-B (e,f), and not NMHC II-A (b,c) is detected.

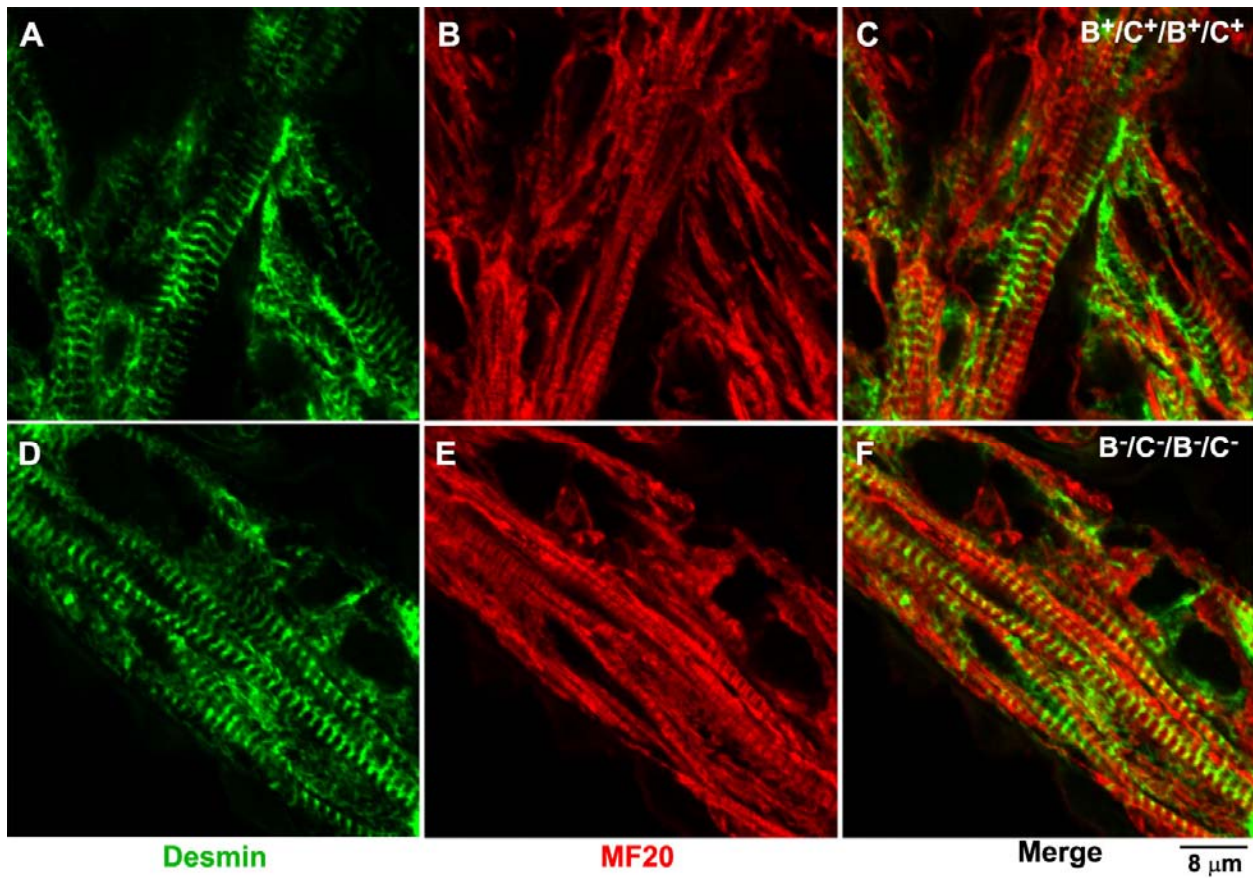

**Fig. S7. Normal Sarcomere Formation in  $B^+C^-/B^+C^-$  Cardiac Myocytes.**

Immunofluorescence confocal images of E13.5 cardiac myocytes stained with MF20 (red, a marker for cardiac myosin II, B,E) and desmin (green, A,D) in  $B^+C^+/B^+C^+$  (A-C) and  $B^+C^-/B^+C^-$  (D-F) mouse hearts. No difference in sarcomere formation is found between  $B^+C^+/B^+C^+$  and  $B^+C^-/B^+C^-$  hearts.
